# Supplementary material for: CVD-deposited Cu2O thin films with a record Hall hole mobility of 263 cm2 V−1 s−1 and field-effect mobility of 0.99 cm2 V−1 s−1
Source: Royal Society of Chemistry journal article supplement (doi:10.1039/d3tc00789h), 2023-01-01
Supplement: d3tc00789h1.pdf [file d3tc00789h1.pdf]

## Supplementary Information<sub>1</sub>

CVD-deposited Cu<sub>2</sub>O thin-films with record Hall hole mobility of 263 cm<sup>2</sup>/Vs and field-effect mobility of 0.99 cm<sup>2</sup>/Vs

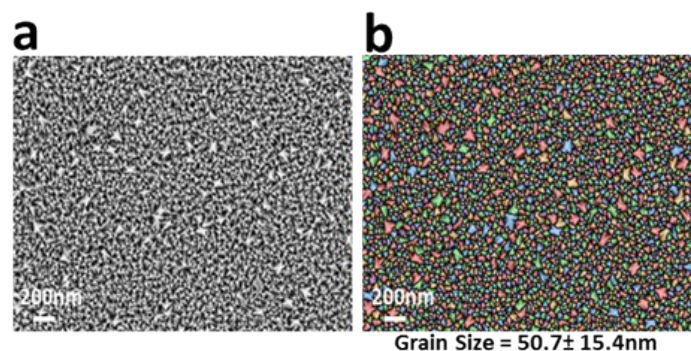

Fig S1 (a) SEM and (b) processed SEM images of Cu<sub>2</sub>O film deposited on SiO<sub>2</sub> at ~100 nm/10 min

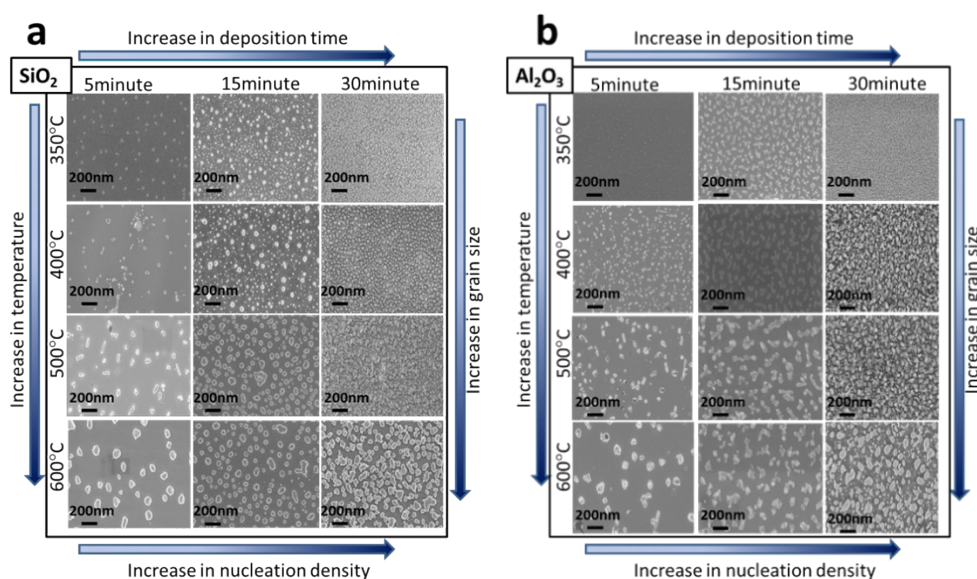

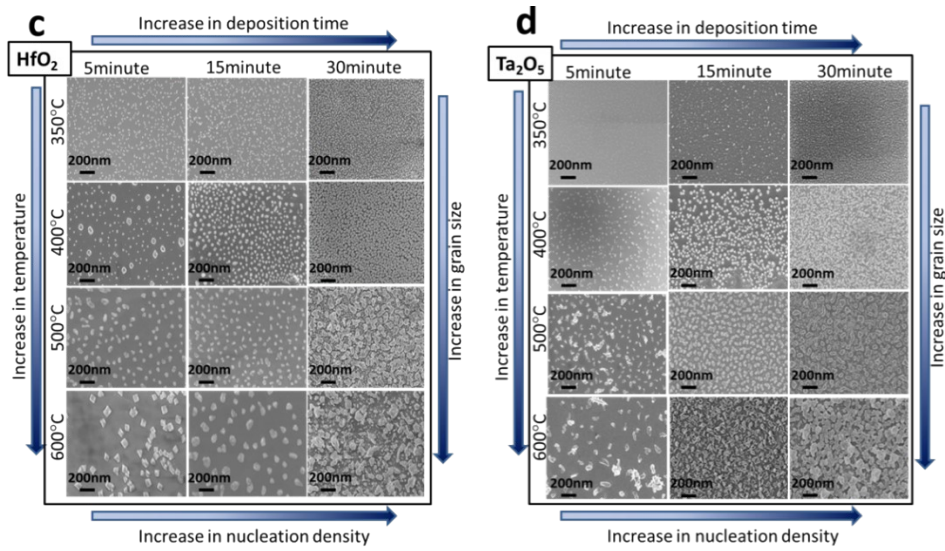

Fig S2  $\text{Cu}_2\text{O}$  depositions on (a)  $\text{SiO}_2$  (b)  $\text{Al}_2\text{O}_3$  (c)  $\text{HfO}_2$  and (d)  $\text{Ta}_2\text{O}_5$  at different temperatures (350°C, 400°C, 500°C, and 600°C), for different durations (5 min, 15 min and 30 min).

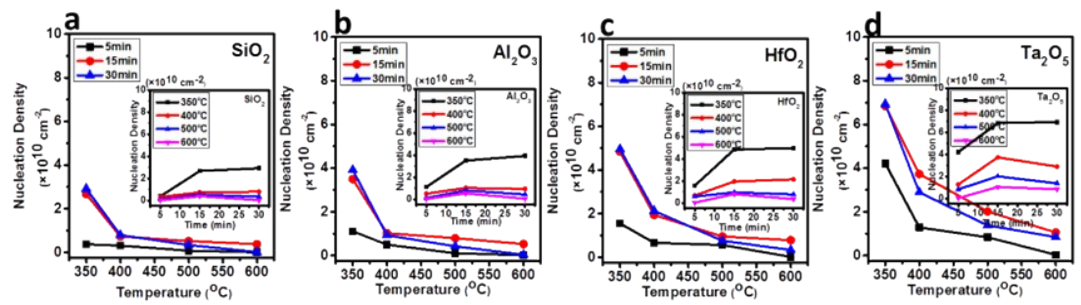

Fig S3 Nucleation density vs Temperature & duration: (a)  $\text{SiO}_2$  (b)  $\text{Al}_2\text{O}_3$  (c)  $\text{HfO}_2$  and (d)  $\text{Ta}_2\text{O}_5$

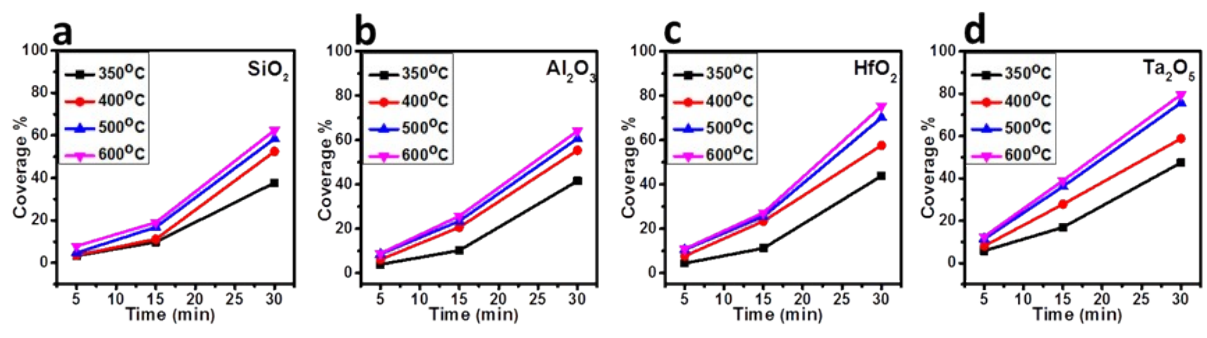

Fig S4 Coverage vs duration, at different temperatures (a)  $\text{SiO}_2$  (b)  $\text{Al}_2\text{O}_3$  (c)  $\text{HfO}_2$  and (d)  $\text{Ta}_2\text{O}_5$

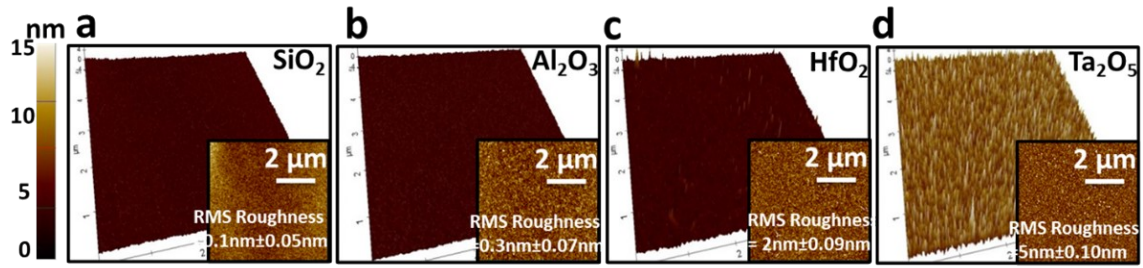

Fig S5: AFM image (a)  $\text{SiO}_2$ , (b)  $\text{Al}_2\text{O}_3$  (c)  $\text{Ta}_2\text{O}_5$ , (d)  $\text{HfO}_2$ .

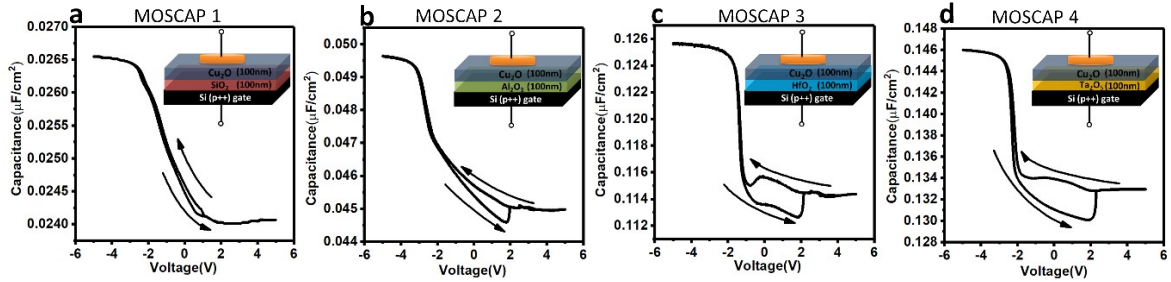

Fig S6: C–V curves for  $\text{Cu}_2\text{O}$  MOS capacitors with different dielectrics, swept from -5V to 5V with the frequency of 100 KHz to observe hysteresis of (a) MOSCAP 1 with  $\text{SiO}_2$ , (b) MOSCAP 2 with  $\text{Al}_2\text{O}_3$ , (c) MOSCAP 3 with  $\text{HfO}_2$  and (d) MOSCAP 4 with  $\text{Ta}_2\text{O}_5$

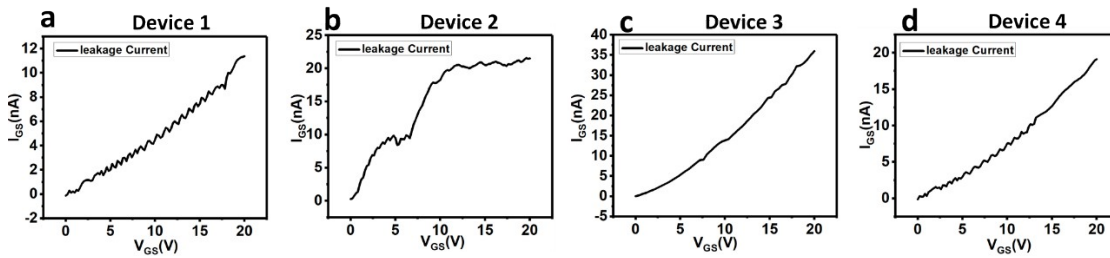

Fig S7: Gate leakage current with (a)  $\text{SiO}_2$ , (b)  $\text{Al}_2\text{O}_3$ , (c)  $\text{HfO}_2$  and (d)  $\text{Ta}_2\text{O}_5$

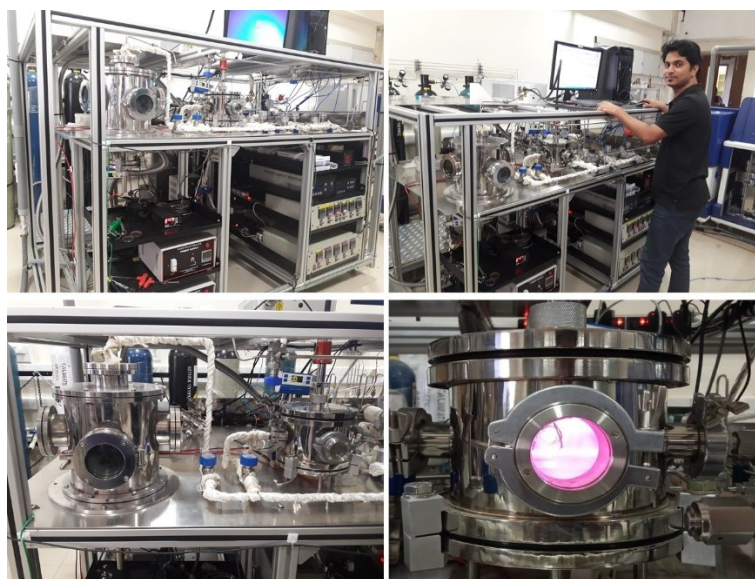

Fig S8: - CVD reactor images

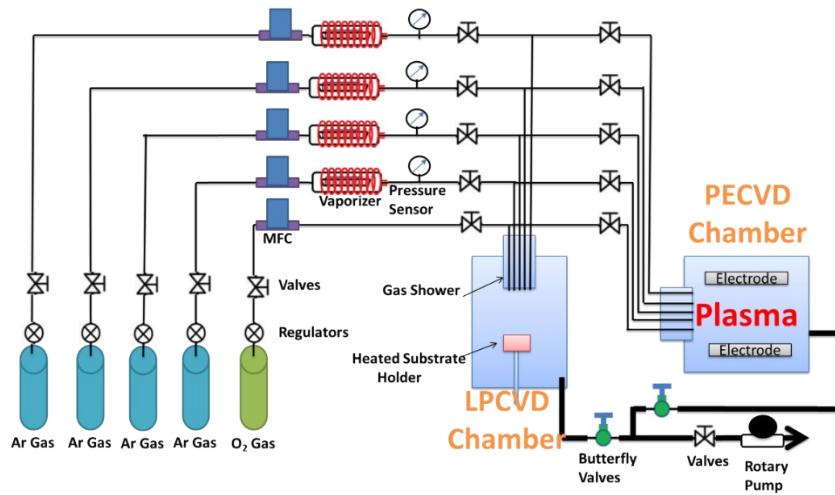

Fig S9: CVD P&ID Diagram

Substrate is highly doped p-type Si (100)

SiO<sub>2</sub> :- Thermally grown (in Clean Room)

Al<sub>2</sub>O<sub>3</sub> :- Deposited using ALD (in Clean Room)

Ta<sub>2</sub>O<sub>5</sub> :- Deposited using sputtering (in Clean Room, at room temperature)

HfO<sub>2</sub> :- Deposited using sputtering (in Clean Room, at room temperature)
